# Supplementary material
Source: Springer Nature journal article supplement (https://www.springermedizin.de/resource/supplementary/13023_2009_193_MOESM9_ESM.pdf/9641832)

3V2c  
H3.5MHz 160r  
Cardiologie  
General

70dB T1/ 0/1  
Gain= 8dB

Stock. en cours  
FC= 56bpm

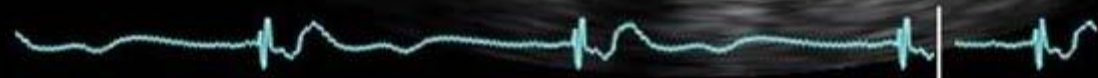

|              |
|--------------|
| -----1-----  |
| Dist = 1.40c |
| -----2-----  |
| Dist = 2.07c |
| -----3-----  |
| Dist = 1.48c |
| -----4-----  |
| Dist = 1.27c |

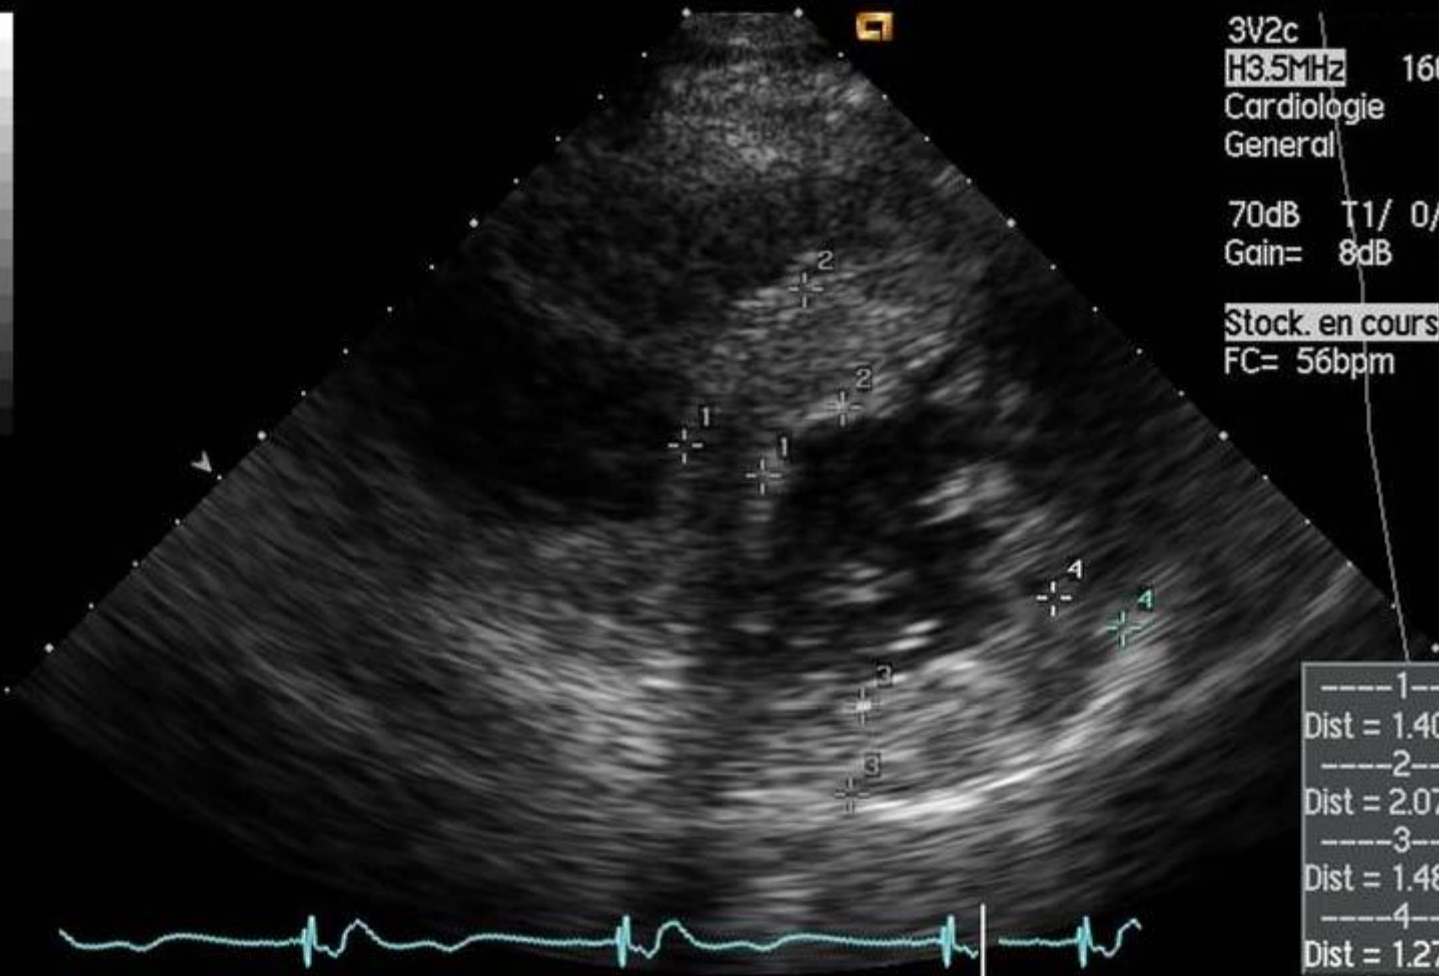

Supplement: MOESM9 [file 9641832]
